# Supplementary material for: Potential Distribution of <em>Aedes (Ochlerotatus) scapularis</em> (Diptera: Culicidae): A Vector Mosquito New to the Florida Peninsula
Source: Preprints.org preprint supplement (doi:10.20944/preprints202012.0502.v1), 2020-12-21
Supplement: Supplementary file 1 [file supplementary]

## Sheet: calibration_results (2)
Results of 595 candidate models. The model name includes a number following the "M_" indicating the regulization multipler value. The letter or letters following the "F_" indicates the feature class or classes, and the Set number indicates the candidate set of environmental variables.
Model	Mean AUC ratio	pvalue of pROC	Omission rate at 5%	AICc	delta AICc	W AICc	number of parameters
M_0.1_F_l_Set1	1.15669	0	0.0555556	2562.31	48.0706	6.13504e-14	4
M_0.1_F_l_Set2	1.15698	0	0.0555556	2562.94	48.6956	4.49606e-14	4
M_0.1_F_l_Set3	1.16273	0	0.0555556	2562.84	48.6017	4.72023e-14	4
M_0.1_F_l_Set4	1.1871	0	0.0555556	2567.59	53.3521	4.397e-15	4
M_0.1_F_l_Set5	1.15593	0	0.0555556	2569.94	55.7016	1.3605e-15	3
M_0.1_F_q_Set1	1.19191	0	0.0555556	2559.62	45.3812	2.37405e-13	4
M_0.1_F_q_Set2	1.18642	0	0.0555556	2562.77	48.5237	4.94124e-14	4
M_0.1_F_q_Set3	1.20395	0	0.0555556	2559.34	45.096	2.74715e-13	4
M_0.1_F_q_Set4	1.22373	0	0	2567.39	53.148	4.9109e-15	4
M_0.1_F_q_Set5	1.1578	0	0.0277778	2574.76	60.5136	1.2373e-16	3
M_0.1_F_p_Set1	1.18128	0	0.0555556	2558.74	44.5018	3.7165e-13	6
M_0.1_F_p_Set2	1.16978	0	0.0555556	2556.61	42.3687	1.08165e-12	6
M_0.1_F_p_Set3	1.19753	0	0.0555556	2559.66	45.4169	2.36005e-13	6
M_0.1_F_p_Set4	1.23404	0	0.0555556	2561.4	47.1534	9.92165e-14	6
M_0.1_F_p_Set5	1.21412	0	0	2581.41	67.1728	4.46867e-18	3
M_0.1_F_lp_Set1	1.14574	0	0.0833333	2552.09	37.8462	1.04502e-11	10
M_0.1_F_lp_Set2	1.14342	0	0.0833333	2557.79	43.552	6.03784e-13	10
M_0.1_F_lp_Set3	1.17169	0	0.0555556	2545.23	30.9852	3.23944e-10	9
M_0.1_F_lp_Set4	1.1144	0	0.0833333	2559.57	45.329	2.49184e-13	10
M_0.1_F_lp_Set5	1.11875	0	0.0555556	2570.63	56.3873	9.90799e-16	6
M_0.1_F_lq_Set1	1.24779	0	0.0277778	2551.66	37.4168	1.3066e-11	8
M_0.1_F_lq_Set2	1.21039	0	0.0555556	2560.45	46.2064	1.61533e-13	8
M_0.1_F_lq_Set3	1.26097	0	0.0277778	2539.35	25.107	6.17577e-09	8
M_0.1_F_lq_Set4	1.2575	0	0.0277778	2552.41	38.1719	9.00422e-12	8
M_0.1_F_lq_Set5	1.17921	0	0.0833333	2565.97	51.7328	1.02446e-14	6
M_0.1_F_qp_Set1	1.22543	0	0.0277778	2533.05	18.8084	1.44777e-07	9
M_0.1_F_qp_Set2	1.16663	0	0.0833333	2552.87	38.6325	7.18985e-12	10
M_0.1_F_qp_Set3	1.25919	0	0.0833333	2514.24	0	0.00176056	10
M_0.1_F_qp_Set4	1.19883	0	0.0833333	2551.11	36.8688	1.7396e-11	10
M_0.1_F_qp_Set5	1.14319	0	0.0555556	2576.03	61.7896	6.7568e-17	6
M_0.1_F_lqp_Set1	1.16431	0	0.0833333	2540.31	26.0664	3.86996e-09	12
M_0.1_F_lqp_Set2	1.15443	0	0.0833333	2570.7	56.4556	9.76195e-16	14
M_0.1_F_lqp_Set3	1.24825	0	0.0833333	2523.1	8.86152	2.1146e-05	14
M_0.1_F_lqp_Set4	1.16178	0	0.0833333	2555.61	41.3734	1.84562e-12	14
M_0.1_F_lqp_Set5	1.13318	0	0.0555556	2566.3	52.0552	8.85907e-15	8
M_0.2_F_l_Set1	1.14705	0	0.0555556	2562.36	48.1163	6.36043e-14	4
M_0.2_F_l_Set2	1.14898	0	0.0555556	2562.95	48.709	4.73751e-14	4
M_0.2_F_l_Set3	1.15381	0	0.0555556	2562.88	48.6429	4.90564e-14	4
M_0.2_F_l_Set4	1.18864	0	0.0555556	2567.61	53.3641	4.63744e-15	4
M_0.2_F_l_Set5	1.16097	0	0.0555556	2569.94	55.7026	1.44295e-15	3
M_0.2_F_q_Set1	1.19793	0	0.0555556	2559.66	45.4144	2.47791e-13	4
M_0.2_F_q_Set2	1.18642	0	0.0555556	2562.79	48.5485	5.17974e-14	4
M_0.2_F_q_Set3	1.2072	0	0.0555556	2559.37	45.1242	2.87522e-13	4
M_0.2_F_q_Set4	1.22966	0	0	2567.42	53.1736	5.14705e-15	4
M_0.2_F_q_Set5	1.16031	0	0.0277778	2574.76	60.5146	1.31296e-16	3
M_0.2_F_p_Set1	1.15837	0	0.0555556	2558.92	44.6814	3.60731e-13	6
M_0.2_F_p_Set2	1.14985	0	0.0555556	2556.73	42.4919	1.08e-12	6
M_0.2_F_p_Set3	1.18727	0	0.0555556	2559.76	45.5144	2.38722e-13	6
M_0.2_F_p_Set4	1.23819	0	0	2561.43	47.1899	1.0348e-13	6
M_0.2_F_p_Set5	1.21215	0	0	2581.43	67.1883	4.71029e-18	3
M_0.2_F_lp_Set1	1.15011	0	0.0555556	2554.05	39.8126	4.15344e-12	10
M_0.2_F_lp_Set2	1.15658	0	0.0555556	2559.67	45.4237	2.51634e-13	10
M_0.2_F_lp_Set3	1.1854	0	0.0555556	2548.2	33.9593	7.7807e-11	10
M_0.2_F_lp_Set4	1.15928	0	0.0555556	2560.52	46.2814	1.64483e-13	10
M_0.2_F_lp_Set5	1.14024	0	0.0555556	2571.2	56.9577	7.91765e-16	6
M_0.2_F_lq_Set1	1.23323	0	0.0277778	2552.16	37.9142	1.08304e-11	8
M_0.2_F_lq_Set2	1.18489	0	0.0555556	2561.33	47.085	1.10667e-13	8
M_0.2_F_lq_Set3	1.23388	0	0.0277778	2539.85	25.6131	5.09781e-09	8
M_0.2_F_lq_Set4	1.25302	0	0	2552.71	38.4708	8.24497e-12	8
M_0.2_F_lq_Set5	1.18584	0	0.0277778	2566.03	51.7837	1.06202e-14	6
M_0.2_F_qp_Set1	1.23247	0	0	2535.72	21.4793	4.05004e-08	10
M_0.2_F_qp_Set2	1.17114	0	0.0555556	2558.69	44.4443	4.18305e-13	10
M_0.2_F_qp_Set3	1.29164	0	0.0833333	2518.47	4.23034	0.000226234	10
M_0.2_F_qp_Set4	1.22752	0	0	2552.68	38.4367	8.46344e-12	10
M_0.2_F_qp_Set5	1.15617	0	0.0555556	2576.12	61.8747	6.90028e-17	6
M_0.2_F_lqp_Set1	1.20451	0	0.0555556	2540.83	26.5834	3.18493e-09	12
M_0.2_F_lqp_Set2	1.14536	0	0.0555556	2560.29	46.0475	1.89383e-13	12
M_0.2_F_lqp_Set3	1.27893	0	0.0833333	2524.59	10.3508	1.07057e-05	13
M_0.2_F_lqp_Set4	1.19202	0	0.0555556	2555.48	41.2418	2.10156e-12	14
M_0.2_F_lqp_Set5	1.14501	0	0.0555556	2566.38	52.1391	9.0581e-15	8
M_0.3_F_l_Set1	1.16706	0	0.0555556	2562.41	48.1659	6.61666e-14	4
M_0.3_F_l_Set2	1.15594	0	0.0555556	2562.97	48.7236	5.01601e-14	4
M_0.3_F_l_Set3	1.15559	0	0.0555556	2560.74	46.4942	1.53213e-13	3
M_0.3_F_l_Set4	1.18592	0	0.0555556	2567.62	53.377	4.91525e-15	4
M_0.3_F_l_Set5	1.16709	0	0.0555556	2569.95	55.7038	1.5386e-15	3
M_0.3_F_q_Set1	1.19061	0	0.0555556	2559.69	45.4498	2.59769e-13	4
M_0.3_F_q_Set2	1.18297	0	0.0555556	2562.82	48.576	5.45226e-14	4
M_0.3_F_q_Set3	1.19464	0	0.0555556	2559.4	45.154	3.02332e-13	4
M_0.3_F_q_Set4	1.22329	0	0	2567.44	53.2009	5.41961e-15	4
M_0.3_F_q_Set5	1.15866	0	0.0277778	2574.76	60.5159	1.4008e-16	3
M_0.3_F_p_Set1	1.15617	0	0.0555556	2559.3	45.0623	3.18366e-13	6
M_0.3_F_p_Set2	1.16292	0	0.0555556	2557.02	42.7777	9.99675e-13	6
M_0.3_F_p_Set3	1.18218	0	0.0555556	2559.95	45.7042	2.31856e-13	6
M_0.3_F_p_Set4	1.23529	0	0	2561.68	47.4359	9.77344e-14	6
M_0.3_F_p_Set5	1.21177	0	0	2581.45	67.2059	4.98742e-18	3
M_0.3_F_lp_Set1	1.14765	0	0.0555556	2550.9	36.6557	2.15092e-11	8
M_0.3_F_lp_Set2	1.14949	0	0.0555556	2559.12	44.881	3.52684e-13	9
M_0.3_F_lp_Set3	1.16905	0	0.0555556	2544.56	30.3229	5.12241e-10	8
M_0.3_F_lp_Set4	1.16297	0	0.0555556	2559.34	45.0965	3.17908e-13	9
M_0.3_F_lp_Set5	1.1544	0	0.0555556	2569.52	55.2804	1.9577e-15	5
M_0.3_F_lq_Set1	1.20435	0	0.0555556	2552.51	38.2658	9.7113e-12	8
M_0.3_F_lq_Set2	1.17069	0	0.0555556	2559.53	45.2857	2.90926e-13	7
M_0.3_F_lq_Set3	1.23863	0	0.0277778	2540.51	26.2719	3.92147e-09	8
M_0.3_F_lq_Set4	1.23815	0	0.0277778	2553.66	39.4157	5.49759e-12	8
M_0.3_F_lq_Set5	1.16999	0	0.0555556	2564.23	49.9855	2.79147e-14	5
M_0.3_F_qp_Set1	1.23119	0	0.0277778	2539.64	25.4003	6.0997e-09	10
M_0.3_F_qp_Set2	1.16282	0	0.0555556	2555.56	41.3166	2.13798e-12	8
M_0.3_F_qp_Set3	1.2903	0	0.0277778	2518.8	4.56083	0.000205205	10
M_0.3_F_qp_Set4	1.23027	0	0	2552.08	37.8347	1.22387e-11	10
M_0.3_F_qp_Set5	1.16346	0	0.0555556	2576.26	62.0225	6.85944e-17	6
M_0.3_F_lqp_Set1	1.19306	0	0.0555556	2543.14	28.8966	1.07243e-09	13
M_0.3_F_lqp_Set2	1.15398	0	0.0555556	2561.01	46.7716	1.41168e-13	11
M_0.3_F_lqp_Set3	1.26712	0	0.0833333	2527.99	13.7457	2.09946e-06	14
M_0.3_F_lqp_Set4	1.22049	0	0.0277778	2555.7	41.4551	2.02282e-12	14
M_0.3_F_lqp_Set5	1.1488	0	0.0555556	2567.27	53.0269	6.22373e-15	8
M_0.4_F_l_Set1	1.15524	0	0.0555556	2562.46	48.2193	6.90095e-14	4
M_0.4_F_l_Set2	1.14675	0	0.0555556	2562.98	48.7393	5.33181e-14	4
M_0.4_F_l_Set3	1.16391	0	0.0555556	2560.74	46.5021	1.63521e-13	3
M_0.4_F_l_Set4	1.17629	0	0.0555556	2567.63	53.3903	5.23244e-15	4
M_0.4_F_l_Set5	1.15652	0	0.0555556	2569.95	55.7053	1.64779e-15	3
M_0.4_F_q_Set1	1.19458	0	0.0555556	2559.73	45.4873	2.73281e-13	4
M_0.4_F_q_Set2	1.18245	0	0.0555556	2562.85	48.6064	5.75682e-14	4
M_0.4_F_q_Set3	1.1911	0	0.0555556	2559.43	45.1855	3.19095e-13	4
M_0.4_F_q_Set4	1.22522	0	0	2567.47	53.2299	5.72812e-15	4
M_0.4_F_q_Set5	1.16645	0	0	2574.76	60.5173	1.50135e-16	3
M_0.4_F_p_Set1	1.158	0	0.0555556	2557.46	43.2179	8.58793e-13	5
M_0.4_F_p_Set2	1.1552	0	0.0555556	2557.78	43.5384	7.33162e-13	6
M_0.4_F_p_Set3	1.16317	0	0.0555556	2560.28	46.0365	2.10692e-13	6
M_0.4_F_p_Set4	1.22982	0	0	2562.02	47.7746	8.85408e-14	6
M_0.4_F_p_Set5	1.19612	0	0	2581.47	67.226	5.29941e-18	3
M_0.4_F_lp_Set1	1.15664	0	0.0555556	2555.69	41.4474	2.10327e-12	9
M_0.4_F_lp_Set2	1.15331	0	0.0555556	2559.05	44.8056	3.93183e-13	8
M_0.4_F_lp_Set3	1.15389	0	0.0555556	2547.33	33.0892	1.37939e-10	8
M_0.4_F_lp_Set4	1.16254	0	0.0555556	2558.96	44.7157	4.12991e-13	8
M_0.4_F_lp_Set5	1.15036	0	0.0555556	2569.99	55.7479	1.6644e-15	5
M_0.4_F_lq_Set1	1.19415	0	0.0555556	2548.38	34.1424	8.19877e-11	6
M_0.4_F_lq_Set2	1.16681	0	0.0555556	2560.96	46.7202	1.52561e-13	7
M_0.4_F_lq_Set3	1.22533	0	0.0277778	2537.09	22.8496	2.33243e-08	6
M_0.4_F_lq_Set4	1.22989	0	0.0277778	2555.95	41.712	1.87418e-12	8
M_0.4_F_lq_Set5	1.15719	0	0.0555556	2565.09	50.8528	1.94469e-14	5
M_0.4_F_qp_Set1	1.2055	0	0.0555556	2541.71	27.4712	2.32824e-09	10
M_0.4_F_qp_Set2	1.18141	0	0.0555556	2559.75	45.5066	2.82894e-13	9
M_0.4_F_qp_Set3	1.27567	0	0.0277778	2521.32	7.07973	6.26357e-05	10
M_0.4_F_qp_Set4	1.23002	0	0	2550.28	36.0392	3.2306e-11	9
M_0.4_F_qp_Set5	1.17026	0	0.0555556	2574.18	59.935	2.09566e-16	5
M_0.4_F_lqp_Set1	1.17322	0	0.0555556	2541.06	26.8148	3.26757e-09	11
M_0.4_F_lqp_Set2	1.15373	0	0.0555556	2564.28	50.0347	2.97185e-14	11
M_0.4_F_lqp_Set3	1.25363	0	0.0555556	2526.61	12.3693	4.497e-06	13
M_0.4_F_lqp_Set4	1.20982	0	0.0277778	2553.21	38.9706	7.54159e-12	12
M_0.4_F_lqp_Set5	1.15333	0	0.0555556	2568.96	54.7226	2.87016e-15	8
M_0.5_F_l_Set1	1.15762	0	0.0555556	2562.52	48.2766	7.22096e-14	4
M_0.5_F_l_Set2	1.15754	0	0.0555556	2563	48.7561	5.69419e-14	4
M_0.5_F_l_Set3	1.15966	0	0.0555556	2560.75	46.5106	1.75386e-13	3
M_0.5_F_l_Set4	1.18453	0	0.0555556	2567.65	53.4045	5.59718e-15	4
M_0.5_F_l_Set5	1.17647	0	0.0555556	2569.95	55.707	1.77396e-15	3
M_0.5_F_q_Set1	1.19008	0	0.0555556	2559.77	45.5269	2.88727e-13	4
M_0.5_F_q_Set2	1.17954	0	0.0555556	2562.88	48.6395	6.10333e-14	4
M_0.5_F_q_Set3	1.18676	0	0.0555556	2559.46	45.2187	3.38334e-13	4
M_0.5_F_q_Set4	1.22667	0	0	2567.5	53.2607	6.08141e-15	4
M_0.5_F_q_Set5	1.16172	0	0	2574.76	60.5188	1.61771e-16	3
M_0.5_F_p_Set1	1.16066	0	0.0555556	2557.83	43.5866	7.70321e-13	5
M_0.5_F_p_Set2	1.15738	0	0.0555556	2558.64	44.3979	5.14606e-13	6
M_0.5_F_p_Set3	1.16092	0	0.0555556	2560.88	46.6337	1.68633e-13	6
M_0.5_F_p_Set4	1.21622	0	0	2562.69	48.4479	6.82299e-14	6
M_0.5_F_p_Set5	1.19664	0	0	2581.49	67.2483	5.65591e-18	3
M_0.5_F_lp_Set1	1.15234	0	0.0555556	2555.5	41.2544	2.50033e-12	8
M_0.5_F_lp_Set2	1.16066	0	0.0555556	2557.7	43.4611	8.31395e-13	7
M_0.5_F_lp_Set3	1.14804	0	0.0555556	2548.95	34.7073	6.63239e-11	8
M_0.5_F_lp_Set4	1.17605	0	0.0277778	2564.33	50.0875	3.04014e-14	9
M_0.5_F_lp_Set5	1.15817	0	0.0277778	2572.71	58.4703	4.60864e-16	6
M_0.5_F_lq_Set1	1.1873	0	0.0555556	2548.91	34.6637	6.82512e-11	6
M_0.5_F_lq_Set2	1.16787	0	0.0555556	2562.33	48.0837	8.33677e-14	7
M_0.5_F_lq_Set3	1.22697	0	0.0277778	2537.73	23.4895	1.83043e-08	6
M_0.5_F_lq_Set4	1.22133	0	0.0277778	2554.15	39.9113	4.98452e-12	7
M_0.5_F_lq_Set5	1.1562	0	0.0555556	2566.27	52.0269	1.1688e-14	5
M_0.5_F_qp_Set1	1.18816	0	0.0555556	2540.47	26.2286	4.68586e-09	8
M_0.5_F_qp_Set2	1.16998	0	0.0555556	2560.95	46.7072	1.67855e-13	9
M_0.5_F_qp_Set3	1.26404	0	0.0277778	2521.34	7.09401	6.72677e-05	9
M_0.5_F_qp_Set4	1.2116	0	0	2553.63	39.3913	6.53978e-12	9
M_0.5_F_qp_Set5	1.17238	0	0.0277778	2571.98	57.743	6.78513e-16	4
M_0.5_F_lqp_Set1	1.17228	0	0.0555556	2541.14	26.9007	3.38762e-09	11
M_0.5_F_lqp_Set2	1.16277	0	0.0555556	2561.1	46.8614	1.57221e-13	10
M_0.5_F_lqp_Set3	1.24169	0	0.0555556	2523.95	9.7078	1.84213e-05	11
M_0.5_F_lqp_Set4	1.18599	0	0.0277778	2555.97	41.7313	2.05365e-12	13
M_0.5_F_lqp_Set5	1.1538	0	0.0555556	2569.64	55.3936	2.2224e-15	7
M_0.6_F_l_Set1	1.15394	0	0.0555556	2562.58	48.3387	7.58254e-14	4
M_0.6_F_l_Set2	1.1416	0	0.0555556	2563.02	48.7741	6.1138e-14	4
M_0.6_F_l_Set3	1.16229	0	0.0555556	2562.95	48.7036	6.34823e-14	4
M_0.6_F_l_Set4	1.17763	0	0.0555556	2567.66	53.4195	6.02074e-15	4
M_0.6_F_l_Set5	1.15719	0	0.0555556	2569.95	55.7089	1.9211e-15	3
M_0.6_F_q_Set1	1.19309	0	0.0555556	2559.81	45.5686	3.06576e-13	4
M_0.6_F_q_Set2	1.17714	0	0.0555556	2562.92	48.6757	6.49965e-14	4
M_0.6_F_q_Set3	1.19621	0	0.0555556	2559.5	45.2535	3.60624e-13	4
M_0.6_F_q_Set4	1.223	0	0	2567.53	53.2932	6.49098e-15	4
M_0.6_F_q_Set5	1.16866	0	0	2574.76	60.5207	1.75362e-16	3
M_0.6_F_p_Set1	1.16165	0	0.0555556	2558.32	44.0803	6.53076e-13	5
M_0.6_F_p_Set2	1.15607	0	0.0555556	2559.64	45.4026	3.37982e-13	6
M_0.6_F_p_Set3	1.15709	0	0.0555556	2561.53	47.2881	1.31986e-13	6
M_0.6_F_p_Set4	1.21557	0	0	2563.37	49.1278	5.27365e-14	6
M_0.6_F_p_Set5	1.18983	0	0	2581.51	67.2729	6.06755e-18	3
M_0.6_F_lp_Set1	1.15611	0	0.0555556	2557.59	43.3444	9.55198e-13	8
M_0.6_F_lp_Set2	1.15138	0	0.0555556	2556.97	42.7267	1.30409e-12	6
M_0.6_F_lp_Set3	1.15323	0	0.0555556	2548.89	34.645	7.43514e-11	7
M_0.6_F_lp_Set4	1.17727	0	0.0277778	2566.82	52.5824	9.491e-15	9
M_0.6_F_lp_Set5	1.15767	0	0.0277778	2568.68	54.4359	3.76633e-15	4
M_0.6_F_lq_Set1	1.17667	0	0.0555556	2549.64	35.3943	5.15038e-11	6
M_0.6_F_lq_Set2	1.16347	0	0.0555556	2561.1	46.8563	1.67487e-13	6
M_0.6_F_lq_Set3	1.22175	0	0.0277778	2537.94	23.6964	1.79543e-08	6
M_0.6_F_lq_Set4	1.22335	0	0.0277778	2554.98	40.7372	3.58843e-12	7
M_0.6_F_lq_Set5	1.15064	0	0.0555556	2568.15	53.9043	4.97498e-15	5
M_0.6_F_qp_Set1	1.1839	0	0.0555556	2541.37	27.1289	3.25163e-09	7
M_0.6_F_qp_Set2	1.18256	0	0.0555556	2564.83	50.5917	2.62009e-14	8
M_0.6_F_qp_Set3	1.24722	0	0.0277778	2522.26	8.01783	4.61526e-05	9
M_0.6_F_qp_Set4	1.20698	0	0	2558.65	44.4072	5.80038e-13	10
M_0.6_F_qp_Set5	1.16695	0	0.0277778	2572.04	57.7957	7.19934e-16	4
M_0.6_F_lqp_Set1	1.15933	0	0.0555556	2536.91	22.6676	3.06451e-08	8
M_0.6_F_lqp_Set2	1.16739	0	0.0555556	2564.9	50.6563	2.56924e-14	9
M_0.6_F_lqp_Set3	1.23366	0	0.0555556	2527.53	13.29	3.34899e-06	12
M_0.6_F_lqp_Set4	1.18845	0	0.0277778	2554.14	39.9001	5.59412e-12	11
M_0.6_F_lqp_Set5	1.15981	0	0.0555556	2568.86	54.6138	3.57936e-15	6
M_0.7_F_l_Set1	1.15231	0	0.0555556	2562.64	48.4033	8.00811e-14	4
M_0.7_F_l_Set2	1.15482	0	0.0555556	2563.03	48.7932	6.60692e-14	4
M_0.7_F_l_Set3	1.16212	0	0.0555556	2562.97	48.7325	6.82822e-14	4
M_0.7_F_l_Set4	1.1785	0	0.0555556	2567.68	53.4351	6.52042e-15	4
M_0.7_F_l_Set5	1.16468	0	0.0277778	2567.82	53.5815	6.07601e-15	2
M_0.7_F_q_Set1	1.19432	0	0.0555556	2559.85	45.6124	3.27524e-13	4
M_0.7_F_q_Set2	1.17662	0	0.0555556	2562.96	48.7144	6.96274e-14	4
M_0.7_F_q_Set3	1.19792	0	0.0555556	2559.53	45.29	3.86846e-13	4
M_0.7_F_q_Set4	1.21689	0	0	2567.57	53.3273	6.97287e-15	4
M_0.7_F_q_Set5	1.17014	0	0	2574.76	60.5227	1.91465e-16	3
M_0.7_F_p_Set1	1.15356	0	0.0555556	2558.89	44.651	5.36711e-13	5
M_0.7_F_p_Set2	1.15452	0	0.0555556	2560.91	46.67	1.96102e-13	6
M_0.7_F_p_Set3	1.14907	0	0.0555556	2559.75	45.5079	3.51555e-13	5
M_0.7_F_p_Set4	1.21937	0	0	2564.59	50.3447	3.13944e-14	6
M_0.7_F_p_Set5	1.18777	0	0	2581.54	67.2997	6.55072e-18	3
M_0.7_F_lp_Set1	1.15316	0	0.0555556	2557.25	43.0037	1.23959e-12	7
M_0.7_F_lp_Set2	1.15328	0	0.0555556	2560.95	46.7117	1.94655e-13	7
M_0.7_F_lp_Set3	1.15482	0	0.0555556	2548.28	34.0391	1.10223e-10	6
M_0.7_F_lp_Set4	1.18242	0	0.0277778	2562.01	47.7677	1.15431e-13	7
M_0.7_F_lp_Set5	1.16323	0	0.0555556	2569.21	54.9661	3.16521e-15	4
M_0.7_F_lq_Set1	1.16654	0	0.0555556	2550.38	36.143	3.88118e-11	6
M_0.7_F_lq_Set2	1.17042	0	0.0555556	2561.91	47.6687	1.22286e-13	6
M_0.7_F_lq_Set3	1.2235	0	0.0555556	2538.23	23.9868	1.70225e-08	6
M_0.7_F_lq_Set4	1.2142	0	0.0277778	2556.51	42.2653	1.83275e-12	7
M_0.7_F_lq_Set5	1.15325	0	0.0555556	2567.46	53.2149	7.70233e-15	4
M_0.7_F_qp_Set1	1.18359	0	0.0555556	2543.29	29.0478	1.36665e-09	7
M_0.7_F_qp_Set2	1.1747	0	0.0555556	2566.1	51.8625	1.52307e-14	8
M_0.7_F_qp_Set3	1.24243	0	0.0277778	2519.45	5.20554	0.000206661	7
M_0.7_F_qp_Set4	1.20646	0	0	2558.36	44.1155	7.36671e-13	10
M_0.7_F_qp_Set5	1.17332	0	0.0277778	2572.08	57.8363	7.74563e-16	4
M_0.7_F_lqp_Set1	1.1652	0	0.0555556	2541.33	27.0847	3.69756e-09	9
M_0.7_F_lqp_Set2	1.15205	0	0.0555556	2569.42	55.1825	2.93606e-15	10
M_0.7_F_lqp_Set3	1.21857	0	0.0555556	2522.93	8.68832	3.67342e-05	9
M_0.7_F_lqp_Set4	1.19112	0	0.0277778	2557.13	42.8876	1.38042e-12	11
M_0.7_F_lqp_Set5	1.16364	0	0.0555556	2570.07	55.8271	2.14523e-15	6
M_0.8_F_l_Set1	1.15038	0	0.0555556	2562.71	48.4724	8.50665e-14	4
M_0.8_F_l_Set2	1.15694	0	0.0555556	2563.05	48.8133	7.19417e-14	4
M_0.8_F_l_Set3	1.15368	0	0.0555556	2563	48.7614	7.40442e-14	4
M_0.8_F_l_Set4	1.18452	0	0.0555556	2567.69	53.4515	7.11697e-15	4
M_0.8_F_l_Set5	1.16587	0	0.0277778	2567.83	53.5849	6.67727e-15	2
M_0.8_F_q_Set1	1.18231	0	0.0555556	2559.9	45.6584	3.52428e-13	4
M_0.8_F_q_Set2	1.17671	0	0.0555556	2563	48.756	7.51062e-14	4
M_0.8_F_q_Set3	1.18529	0	0.0555556	2559.57	45.3282	4.18109e-13	4
M_0.8_F_q_Set4	1.21975	0	0	2567.6	53.3631	7.54728e-15	4
M_0.8_F_q_Set5	1.16566	0	0	2574.77	60.525	2.10808e-16	3
M_0.8_F_p_Set1	1.16569	0	0.0555556	2559.57	45.3288	4.21668e-13	5
M_0.8_F_p_Set2	1.16494	0	0.0555556	2562.22	47.9744	1.12657e-13	6
M_0.8_F_p_Set3	1.16208	0	0.0555556	2560.21	45.9721	3.07491e-13	5
M_0.8_F_p_Set4	1.22135	0	0	2565.99	51.7503	1.71557e-14	6
M_0.8_F_p_Set5	1.18797	0	0	2581.57	67.3289	7.12585e-18	3
M_0.8_F_lp_Set1	1.15845	0	0.0555556	2559.24	45.0005	5.04297e-13	7
M_0.8_F_lp_Set2	1.15808	0	0.0555556	2563.16	48.9141	7.14736e-14	7
M_0.8_F_lp_Set3	1.16053	0	0.0555556	2546.98	32.7401	2.33131e-10	5
M_0.8_F_lp_Set4	1.1853	0	0.0555556	2566.52	52.2739	1.34023e-14	8
M_0.8_F_lp_Set5	1.16686	0	0.0555556	2567.6	53.3614	7.80442e-15	3
M_0.8_F_lq_Set1	1.16906	0	0.0555556	2551.28	37.0367	2.74485e-11	6
M_0.8_F_lq_Set2	1.16611	0	0.0555556	2560.47	46.2242	2.78483e-13	5
M_0.8_F_lq_Set3	1.21805	0	0.0555556	2536.68	22.4401	4.08098e-08	5
M_0.8_F_lq_Set4	1.20122	0	0.0277778	2555.21	40.973	3.87008e-12	6
M_0.8_F_lq_Set5	1.15225	0	0.0555556	2568.01	53.7721	6.45314e-15	4
M_0.8_F_qp_Set1	1.18379	0	0.0555556	2541.7	27.4557	3.35447e-09	6
M_0.8_F_qp_Set2	1.17541	0	0.0555556	2565.62	51.3816	2.1455e-14	7
M_0.8_F_qp_Set3	1.22466	0	0.0555556	2519.36	5.11774	0.000239239	6
M_0.8_F_qp_Set4	1.20712	0	0	2559.09	44.8477	5.66131e-13	9
M_0.8_F_qp_Set5	1.1709	0	0.0277778	2572.14	57.8986	8.32362e-16	4
M_0.8_F_lqp_Set1	1.15716	0	0.0555556	2543.05	28.8056	1.73431e-09	9
M_0.8_F_lqp_Set2	1.15993	0	0.0555556	2570.88	56.6364	1.57436e-15	10
M_0.8_F_lqp_Set3	1.20365	0	0.0555556	2524.52	10.279	1.84011e-05	9
M_0.8_F_lqp_Set4	1.18949	0	0.0277778	2559.05	44.8104	5.85885e-13	11
M_0.8_F_lqp_Set5	1.15917	0	0.0555556	2571.02	56.7782	1.48047e-15	6
M_0.9_F_l_Set1	1.15516	0	0.0555556	2562.79	48.5452	9.11065e-14	4
M_0.9_F_l_Set2	1.15263	0	0.0555556	2563.08	48.8346	7.90817e-14	4
M_0.9_F_l_Set3	1.15303	0	0.0555556	2563.03	48.7904	8.11082e-14	4
M_0.9_F_l_Set4	1.18222	0	0.0555556	2567.71	53.4686	7.84489e-15	4
M_0.9_F_l_Set5	1.1608	0	0.0277778	2567.83	53.5884	7.41276e-15	2
M_0.9_F_q_Set1	1.18906	0	0.0555556	2559.95	45.7065	3.82735e-13	4
M_0.9_F_q_Set2	1.18356	0	0.0555556	2563.04	48.8006	8.17367e-14	4
M_0.9_F_q_Set3	1.19455	0	0.0555556	2559.61	45.3691	4.56001e-13	4
M_0.9_F_q_Set4	1.21693	0	0	2567.64	53.4006	8.24816e-15	4
M_0.9_F_q_Set5	1.16868	0	0	2574.77	60.5274	2.34541e-16	3
M_0.9_F_p_Set1	1.15964	0	0.0555556	2560.34	46.102	3.19205e-13	5
M_0.9_F_p_Set2	1.1497	0	0.0555556	2564.13	49.8905	4.81762e-14	6
M_0.9_F_p_Set3	1.15301	0	0.0555556	2560.75	46.5122	2.61726e-13	5
M_0.9_F_p_Set4	1.2234	0	0	2567.88	53.6341	7.46079e-15	6
M_0.9_F_p_Set5	1.18426	0	0	2581.6	67.3602	7.8275e-18	3
M_0.9_F_lp_Set1	1.15529	0	0.0555556	2561.18	46.9367	2.13786e-13	7
M_0.9_F_lp_Set2	1.15211	0	0.0555556	2565.51	51.2695	2.45801e-14	7
M_0.9_F_lp_Set3	1.15392	0	0.0555556	2549.46	35.2196	7.5375e-11	6
M_0.9_F_lp_Set4	1.17945	0	0.0555556	2568.38	54.1397	5.89155e-15	7
M_0.9_F_lp_Set5	1.16867	0	0.0277778	2568.31	54.0684	6.126e-15	3
M_0.9_F_lq_Set1	1.16393	0	0.0555556	2552.93	38.6844	1.34656e-11	6
M_0.9_F_lq_Set2	1.15867	0	0.0555556	2561.38	47.1341	1.97637e-13	5
M_0.9_F_lq_Set3	1.21153	0	0.0555556	2536.9	22.6547	4.10187e-08	5
M_0.9_F_lq_Set4	1.19505	0	0.0277778	2556.78	42.5353	1.9836e-12	6
M_0.9_F_lq_Set5	1.16244	0	0.0555556	2568.62	54.3779	5.33767e-15	4
M_0.9_F_qp_Set1	1.18482	0	0.0555556	2540.22	25.9783	7.86579e-09	5
M_0.9_F_qp_Set2	1.1715	0	0.0555556	2566.52	52.2788	1.53519e-14	7
M_0.9_F_qp_Set3	1.20058	0	0.0555556	2522.69	8.44806	5.07412e-05	7
M_0.9_F_qp_Set4	1.20032	0	0	2560.56	46.3167	3.04644e-13	9
M_0.9_F_qp_Set5	1.16628	0	0.0277778	2572.2	57.9588	9.06276e-16	4
M_0.9_F_lqp_Set1	1.1586	0	0.0555556	2543.83	29.5917	1.31406e-09	8
M_0.9_F_lqp_Set2	1.16217	0	0.0555556	2569.8	55.5566	3.03336e-15	9
M_0.9_F_lqp_Set3	1.1804	0	0.0555556	2523.36	9.12121	3.68778e-05	8
M_0.9_F_lqp_Set4	1.18183	0	0.0277778	2555.26	41.0155	4.39085e-12	9
M_0.9_F_lqp_Set5	1.15911	0	0.0555556	2571.91	57.6653	1.06813e-15	6
M_1_F_l_Set1	1.15594	0	0.0555556	2562.87	48.6238	9.85166e-14	4
M_1_F_l_Set2	1.1616	0	0.0555556	2563.1	48.8571	8.79822e-14	4
M_1_F_l_Set3	1.15633	0	0.0555556	2563.06	48.8218	8.98709e-14	4
M_1_F_l_Set4	1.1804	0	0.0555556	2567.73	53.4866	8.75451e-15	4
M_1_F_l_Set5	1.16689	0	0.0277778	2567.83	53.5921	8.33488e-15	2
M_1_F_q_Set1	1.19125	0	0.0555556	2560	45.7568	4.20613e-13	4
M_1_F_q_Set2	1.17845	0	0.0555556	2560.87	46.6331	2.72377e-13	3
M_1_F_q_Set3	1.18308	0	0.0555556	2559.65	45.4093	5.04078e-13	4
M_1_F_q_Set4	1.21107	0	0	2567.68	53.4399	9.12557e-15	4
M_1_F_q_Set5	1.17186	0	0	2574.77	60.53	2.64405e-16	3
M_1_F_p_Set1	1.1621	0	0.0555556	2559.34	45.1019	5.9434e-13	4
M_1_F_p_Set2	1.15537	0	0.0555556	2566.45	52.2131	1.70403e-14	6
M_1_F_p_Set3	1.16511	0	0.0555556	2558.88	44.6425	7.53397e-13	4
M_1_F_p_Set4	1.21034	0	0	2569.9	55.66	3.06348e-15	6
M_1_F_p_Set5	1.17684	0	0	2581.64	67.3939	8.70697e-18	3
M_1_F_lp_Set1	1.15428	0	0.0555556	2563.07	48.829	9.39331e-14	7
M_1_F_lp_Set2	1.15668	0	0.0555556	2569.44	55.197	3.90524e-15	8
M_1_F_lp_Set3	1.16232	0	0.0555556	2551.54	37.3014	3.0149e-11	6
M_1_F_lp_Set4	1.16768	0	0.0555556	2572.78	58.5377	7.40491e-16	8
M_1_F_lp_Set5	1.16865	0	0.0277778	2566.19	51.953	2.00008e-14	2
M_1_F_lq_Set1	1.1686	0	0.0555556	2553.62	39.3823	1.07746e-11	6
M_1_F_lq_Set2	1.16318	0	0.0555556	2564.54	50.2997	4.60665e-14	6
M_1_F_lq_Set3	1.2024	0	0.0555556	2536.97	22.7332	4.47753e-08	5
M_1_F_lq_Set4	1.18455	0	0.0277778	2557.14	42.9025	1.87507e-12	6
M_1_F_lq_Set5	1.15932	0	0.0555556	2569.26	55.0228	4.39358e-15	4
M_1_F_qp_Set1	1.17858	0	0.0555556	2540.59	26.3506	7.42362e-09	5
M_1_F_qp_Set2	1.16904	0	0.0555556	2564.87	50.6316	3.97889e-14	6
M_1_F_qp_Set3	1.18995	0	0.0555556	2523.61	9.36371	3.65309e-05	7
M_1_F_qp_Set4	1.20373	0	0	2560.15	45.9092	4.25225e-13	8
M_1_F_qp_Set5	1.17178	0	0.0277778	2572.27	58.0295	9.96477e-16	4
M_1_F_lqp_Set1	1.16504	0	0.0555556	2546.21	31.973	4.55291e-10	8
M_1_F_lqp_Set2	1.16781	0	0.0555556	2571.1	56.8568	1.80536e-15	9
M_1_F_lqp_Set3	1.16601	0	0.0555556	2522.27	8.02637	7.27244e-05	7
M_1_F_lqp_Set4	1.1914	0	0.0277778	2555.42	41.177	4.62224e-12	8
M_1_F_lqp_Set5	1.16141	0	0.0555556	2570.48	56.2341	2.49469e-15	5
M_2_F_l_Set1	1.16546	0	0.0555556	2560.94	46.6974	2.94873e-13	3
M_2_F_l_Set2	1.14896	0	0.0555556	2563.38	49.1431	8.71653e-14	4
M_2_F_l_Set3	1.14795	0	0.0555556	2563.45	49.2035	8.4918e-14	4
M_2_F_l_Set4	1.18031	0	0.0555556	2567.95	53.7052	8.97964e-15	4
M_2_F_l_Set5	1.17203	0	0.0277778	2567.88	53.639	9.32037e-15	2
M_2_F_q_Set1	1.18101	0	0.0555556	2560.62	46.3809	3.52621e-13	4
M_2_F_q_Set2	1.17719	0	0.0555556	2560.98	46.7367	2.96385e-13	3
M_2_F_q_Set3	1.19446	0	0.0555556	2560.16	45.917	4.48397e-13	4
M_2_F_q_Set4	1.20086	0	0	2568.17	53.9299	8.1943e-15	4
M_2_F_q_Set5	1.16972	0	0	2572.68	58.442	8.62092e-16	2
M_2_F_p_Set1	1.15201	0	0.0555556	2563.81	49.5718	7.30342e-14	5
M_2_F_p_Set2	1.15393	0	0.0555556	2564.34	50.0964	5.64236e-14	4
M_2_F_p_Set3	1.16082	0	0.0555556	2563.06	48.8194	1.07306e-13	5
M_2_F_p_Set4	1.20003	0	0.0277778	2567.61	53.3706	1.10714e-14	4
M_2_F_p_Set5	1.17408	0	0	2582.09	67.8503	7.97708e-18	3
M_2_F_lp_Set1	1.15192	0	0.0555556	2563.09	48.8515	1.0697e-13	4
M_2_F_lp_Set2	1.14241	0	0.0555556	2563.59	49.352	8.36512e-14	4
M_2_F_lp_Set3	1.14459	0	0.0555556	2567.99	53.7505	9.31634e-15	7
M_2_F_lp_Set4	1.16281	0	0.0555556	2568.02	53.7833	9.20484e-15	4
M_2_F_lp_Set5	1.1638	0	0.0277778	2566.28	52.0374	2.21341e-14	2
M_2_F_lq_Set1	1.15722	0	0.0555556	2556.53	42.2868	2.91267e-12	5
M_2_F_lq_Set2	1.16135	0	0.0555556	2562.06	47.8187	1.84067e-13	4
M_2_F_lq_Set3	1.16035	0	0.0555556	2539.81	25.5648	1.25689e-08	5
M_2_F_lq_Set4	1.18573	0	0.0277778	2559.86	45.6167	5.5851e-13	5
M_2_F_lq_Set5	1.16853	0	0.0555556	2570.01	55.7714	3.49877e-15	3
M_2_F_qp_Set1	1.16318	0	0.0555556	2554.07	39.8295	1.01772e-11	6
M_2_F_qp_Set2	1.1559	0	0.0555556	2564.73	50.487	4.95843e-14	5
M_2_F_qp_Set3	1.1661	0	0.0555556	2530.37	16.1322	1.43673e-06	6
M_2_F_qp_Set4	1.18476	0	0.0277778	2561.51	47.2722	2.49696e-13	5
M_2_F_qp_Set5	1.1783	0	0.0277778	2570.18	55.938	3.29341e-15	3
M_2_F_lqp_Set1	1.15913	0	0.0555556	2551.13	36.8887	4.53082e-11	5
M_2_F_lqp_Set2	1.14656	0	0.0555556	2561.99	47.7527	1.99109e-13	4
M_2_F_lqp_Set3	1.14216	0	0.0555556	2527.03	12.7846	7.84073e-06	5
M_2_F_lqp_Set4	1.16074	0	0.0555556	2564.53	50.2848	5.66663e-14	7
M_2_F_lqp_Set5	1.17169	0	0.0277778	2568.42	54.1767	8.13318e-15	3
M_3_F_l_Set1	1.15325	0	0.0555556	2563.44	49.199	9.84482e-14	4
M_3_F_l_Set2	1.15399	0	0.0555556	2563.78	49.5406	8.33868e-14	4
M_3_F_l_Set3	1.14685	0	0.0555556	2563.95	49.7078	7.70669e-14	4
M_3_F_l_Set4	1.17241	0	0.0555556	2568.24	53.9974	9.06762e-15	4
M_3_F_l_Set5	1.16856	0	0.0277778	2567.95	53.704	1.05509e-14	2
M_3_F_q_Set1	1.17384	0	0.0555556	2561.47	47.2334	2.69452e-13	4
M_3_F_q_Set2	1.17577	0	0.0555556	2561.13	46.8837	3.22504e-13	3
M_3_F_q_Set3	1.18553	0	0.0555556	2560.84	46.596	3.74213e-13	4
M_3_F_q_Set4	1.20078	0	0	2568.84	54.6032	6.86312e-15	4
M_3_F_q_Set5	1.17079	0	0	2572.74	58.5033	9.81236e-16	2
M_3_F_p_Set1	1.15573	0	0.0555556	2569.06	54.8155	6.23347e-15	5
M_3_F_p_Set2	1.14935	0	0.0555556	2564.62	50.3799	5.7556e-14	4
M_3_F_p_Set3	1.16141	0	0.0555556	2568.79	54.5499	7.19065e-15	5
M_3_F_p_Set4	1.18808	0	0.0277778	2570.67	56.4298	2.82315e-15	4
M_3_F_p_Set5	1.17323	0	0	2582.76	68.5211	6.71972e-18	3
M_3_F_lp_Set1	1.15007	0	0.0555556	2563.52	49.2746	1.02069e-13	4
M_3_F_lp_Set2	1.13589	0	0.0833333	2564.06	49.8216	7.80433e-14	4
M_3_F_lp_Set3	1.14787	0	0.0555556	2564.04	49.7994	7.93239e-14	4
M_3_F_lp_Set4	1.15902	0	0.0555556	2568.24	53.9993	9.76441e-15	4
M_3_F_lp_Set5	1.17279	0	0.0277778	2566.4	52.1593	2.46301e-14	2
M_3_F_lq_Set1	1.16367	0	0.0555556	2561.98	47.7358	2.26092e-13	5
M_3_F_lq_Set2	1.15859	0	0.0555556	2562.27	48.0332	1.9588e-13	4
M_3_F_lq_Set3	1.15501	0	0.0555556	2543.53	29.2864	2.31792e-09	5
M_3_F_lq_Set4	1.17585	0	0.0277778	2565.23	50.9882	4.51781e-14	5
M_3_F_lq_Set5	1.17712	0	0.0555556	2570.07	55.8333	4.02863e-15	3
M_3_F_qp_Set1	1.15143	0	0.0555556	2561.92	47.6744	2.39426e-13	6
M_3_F_qp_Set2	1.13119	0	0.0555556	2565.93	51.6838	3.24246e-14	5
M_3_F_qp_Set3	1.15297	0	0.0555556	2540.69	26.4523	9.82167e-09	6
M_3_F_qp_Set4	1.1724	0	0.0277778	2567.91	53.6732	1.21233e-14	6
M_3_F_qp_Set5	1.17812	0	0.0277778	2574.75	60.5114	3.99127e-16	5
M_3_F_lqp_Set1	1.14476	0	0.0555556	2558.67	44.4287	1.24689e-12	5
M_3_F_lqp_Set2	1.12946	0	0.0833333	2562.48	48.2423	1.86264e-13	4
M_3_F_lqp_Set3	1.14642	0	0.0555556	2537.84	23.5968	4.20975e-08	5
M_3_F_lqp_Set4	1.16332	0	0.0555556	2566.55	52.3097	2.4647e-14	6
M_3_F_lqp_Set5	1.17709	0	0.0277778	2568.53	54.2933	9.19361e-15	3
M_4_F_l_Set1	1.15314	0	0.0555556	2564.09	49.8443	8.55125e-14	4
M_4_F_l_Set2	1.14865	0	0.0555556	2564.29	50.0498	7.76046e-14	4
M_4_F_l_Set3	1.15531	0	0.0555556	2564.58	50.3348	6.76864e-14	4
M_4_F_l_Set4	1.16617	0	0.0555556	2568.61	54.3637	9.08112e-15	4
M_4_F_l_Set5	1.17463	0	0.0277778	2568.03	53.787	1.21869e-14	2
M_4_F_q_Set1	1.16664	0	0.0555556	2562.57	48.3281	1.87854e-13	4
M_4_F_q_Set2	1.15907	0	0.0555556	2563.61	49.3725	1.12099e-13	4
M_4_F_q_Set3	1.1771	0	0.0555556	2561.69	47.4461	2.95438e-13	4
M_4_F_q_Set4	1.1898	0	0.0277778	2567.2	52.957	1.88967e-14	3
M_4_F_q_Set5	1.17254	0	0	2572.82	58.5821	1.14159e-15	2
M_4_F_p_Set1	1.16281	0	0.0555556	2569.57	55.3308	5.83631e-15	5
M_4_F_p_Set2	1.14319	0	0.0833333	2565.01	50.7714	5.73876e-14	4
M_4_F_p_Set3	1.16438	0	0.0555556	2567.2	52.9583	1.93456e-14	4
M_4_F_p_Set4	1.17602	0	0.0277778	2571.09	56.8459	2.78655e-15	4
M_4_F_p_Set5	1.17294	0	0	2583.64	69.3969	5.27652e-18	3
M_4_F_lp_Set1	1.13738	0	0.0555556	2563.94	49.6995	1.00525e-13	4
M_4_F_lp_Set2	1.13236	0	0.0833333	2564.77	50.5321	6.67081e-14	4
M_4_F_lp_Set3	1.1429	0	0.0555556	2564.46	50.221	7.84294e-14	4
M_4_F_lp_Set4	1.14872	0	0.0555556	2568.5	54.2538	1.0508e-14	4
M_4_F_lp_Set5	1.17703	0	0.0277778	2568.7	54.4582	9.54768e-15	3
M_4_F_lq_Set1	1.1571	0	0.0555556	2562.01	47.7722	2.71973e-13	4
M_4_F_lq_Set2	1.15068	0	0.0555556	2562.55	48.3061	2.096e-13	4
M_4_F_lq_Set3	1.15756	0	0.0555556	2547.96	33.7182	3.10408e-10	5
M_4_F_lq_Set4	1.17002	0	0.0555556	2567.92	53.6789	1.44659e-14	4
M_4_F_lq_Set5	1.16865	0	0.0277778	2570.16	55.9165	4.7569e-15	3
M_4_F_qp_Set1	1.14086	0	0.0555556	2566.72	52.4738	2.6778e-14	6
M_4_F_qp_Set2	1.1328	0	0.0833333	2566.53	52.2893	2.95621e-14	5
M_4_F_qp_Set3	1.1457	0	0.0555556	2544.85	30.6091	1.51856e-09	6
M_4_F_qp_Set4	1.13779	0	0.0833333	2572.36	58.1225	1.62147e-15	6
M_4_F_qp_Set5	1.17808	0	0.0555556	2572.86	58.6146	1.27646e-15	4
M_4_F_lqp_Set1	1.13189	0	0.0555556	2563.6	49.3557	1.31678e-13	5
M_4_F_lqp_Set2	1.13012	0	0.0833333	2562.87	48.6287	1.90718e-13	4
M_4_F_lqp_Set3	1.13993	0	0.0555556	2544.2	29.9604	2.17357e-09	6
M_4_F_lqp_Set4	1.15787	0	0.0555556	2571.05	56.8091	3.2365e-15	6
M_4_F_lqp_Set5	1.18431	0	0.0277778	2570.91	56.6669	3.4996e-15	4
M_5_F_l_Set1	1.14717	0	0.0555556	2564.87	50.6242	7.23207e-14	4
M_5_F_l_Set2	1.14591	0	0.0555556	2564.91	50.6724	7.11041e-14	4
M_5_F_l_Set3	1.14506	0	0.0555556	2565.33	51.0849	5.8268e-14	4
M_5_F_l_Set4	1.15936	0	0.0555556	2569.05	54.8097	9.11485e-15	4
M_5_F_l_Set5	1.16816	0	0.0277778	2568.13	53.8878	1.45586e-14	2
M_5_F_q_Set1	1.1677	0	0.0555556	2561.53	47.2906	3.97079e-13	3
M_5_F_q_Set2	1.15001	0	0.0555556	2564	49.7537	1.16743e-13	4
M_5_F_q_Set3	1.17221	0	0.0555556	2562.72	48.4749	2.22921e-13	4
M_5_F_q_Set4	1.17747	0	0.0277778	2567.32	53.0832	2.24253e-14	3
M_5_F_q_Set5	1.17646	0	0	2572.92	58.6783	1.37742e-15	2
M_5_F_p_Set1	1.16364	0	0.0555556	2570.28	56.0349	5.2047e-15	5
M_5_F_p_Set2	1.14345	0	0.0833333	2565.52	51.2794	5.65426e-14	4
M_5_F_p_Set3	1.16556	0	0.0555556	2567.59	53.3449	2.02871e-14	4
M_5_F_p_Set4	1.16766	0	0.0555556	2571.59	57.3458	2.76579e-15	4
M_5_F_p_Set5	1.16689	0	0	2584.71	70.4718	3.93523e-18	3
M_5_F_lp_Set1	1.1359	0	0.0555556	2564.65	50.4121	9.00163e-14	4
M_5_F_lp_Set2	1.12894	0	0.0833333	2565.53	51.284	5.86771e-14	4
M_5_F_lp_Set3	1.13925	0	0.0555556	2564.94	50.6942	7.94382e-14	4
M_5_F_lp_Set4	1.14175	0	0.0833333	2568.81	54.566	1.15563e-14	4
M_5_F_lp_Set5	1.17926	0	0.0277778	2571.16	56.916	3.59819e-15	4
M_5_F_lq_Set1	1.15252	0	0.0555556	2560.31	46.0711	8.21488e-13	3
M_5_F_lq_Set2	1.13511	0	0.0555556	2562.88	48.6339	2.29991e-13	4
M_5_F_lq_Set3	1.15564	0	0.0555556	2553.01	38.7688	3.21776e-11	5
M_5_F_lq_Set4	1.15249	0	0.0555556	2568.13	53.884	1.69438e-14	4
M_5_F_lq_Set5	1.17878	0	0.0277778	2570.26	56.0208	5.8711e-15	3
M_5_F_qp_Set1	1.1481	0	0.0555556	2562.12	47.8792	3.47044e-13	3
M_5_F_qp_Set2	1.13365	0	0.0833333	2564.8	50.5623	9.15225e-14	4
M_5_F_qp_Set3	1.14273	0	0.0555556	2552.66	38.4228	3.99387e-11	6
M_5_F_qp_Set4	1.13402	0	0.111111	2570.24	56.0024	6.13595e-15	4
M_5_F_qp_Set5	1.16943	0	0.0555556	2573.27	59.0286	1.36338e-15	4
M_5_F_lqp_Set1	1.13413	0	0.0555556	2565.21	50.9681	7.74172e-14	5
M_5_F_lqp_Set2	1.13196	0	0.0833333	2563.4	49.1598	1.92952e-13	4
M_5_F_lqp_Set3	1.13745	0	0.0555556	2556.32	42.0764	6.72334e-12	7
M_5_F_lqp_Set4	1.13914	0	0.0833333	2570.57	56.3309	5.44844e-15	5
M_5_F_lqp_Set5	1.18124	0	0.0277778	2571.23	56.9835	3.96842e-15	4
M_6_F_l_Set1	1.15294	0	0.0555556	2565.78	51.5416	6.08725e-14	4
M_6_F_l_Set2	1.14015	0	0.0555556	2565.65	51.4079	6.57005e-14	4
M_6_F_l_Set3	1.14273	0	0.0555556	2566.2	51.9595	5.03477e-14	4
M_6_F_l_Set4	1.15741	0	0.0555556	2569.57	55.3236	9.45542e-15	4
M_6_F_l_Set5	1.17692	0	0.0277778	2568.25	54.0061	1.84513e-14	2
M_6_F_q_Set1	1.16626	0	0.0555556	2561.8	47.5615	4.67472e-13	3
M_6_F_q_Set2	1.13569	0	0.0555556	2564.45	50.205	1.25915e-13	4
M_6_F_q_Set3	1.16204	0	0.0555556	2563.94	49.6955	1.6409e-13	4
M_6_F_q_Set4	1.16298	0	0.0277778	2567.48	53.2362	2.82264e-14	3
M_6_F_q_Set5	1.17392	0	0	2573.03	58.7919	1.77314e-15	2
M_6_F_p_Set1	1.16068	0	0.0555556	2571.13	56.8921	4.63224e-15	5
M_6_F_p_Set2	1.13804	0	0.0555556	2566.07	51.8258	5.89501e-14	4
M_6_F_p_Set3	1.16412	0	0.0555556	2568.05	53.813	2.20599e-14	4
M_6_F_p_Set4	1.15498	0	0.0555556	2572.18	57.9346	2.83964e-15	4
M_6_F_p_Set5	1.16583	0	0	2585.98	71.7397	2.8857e-18	3
M_6_F_lp_Set1	1.13495	0	0.0555556	2565.43	51.1842	8.48375e-14	4
M_6_F_lp_Set2	1.13143	0	0.0555556	2566.45	52.2039	5.15199e-14	4
M_6_F_lp_Set3	1.14794	0	0.0555556	2565.47	51.2317	8.47156e-14	4
M_6_F_lp_Set4	1.13046	0	0.111111	2569.17	54.9246	1.35206e-14	4
M_6_F_lp_Set5	1.17643	0	0.0277778	2574.29	60.0487	1.05512e-15	5
M_6_F_lq_Set1	1.15284	0	0.0555556	2562.78	48.5354	3.37617e-13	4
M_6_F_lq_Set2	1.13097	0	0.0555556	2563.27	49.0237	2.67609e-13	4
M_6_F_lq_Set3	1.15091	0	0.0555556	2558.44	44.1963	3.02646e-12	5
M_6_F_lq_Set4	1.16562	0	0.0555556	2568.37	54.1242	2.13969e-14	4
M_6_F_lq_Set5	1.16897	0	0.0277778	2568.25	54.0133	2.28943e-14	2
M_6_F_qp_Set1	1.13901	0	0.0555556	2564.55	50.3079	1.4781e-13	4
M_6_F_qp_Set2	1.13417	0	0.0833333	2565.3	51.0611	1.027e-13	4
M_6_F_qp_Set3	1.14506	0	0.0555556	2556.89	42.65	6.97431e-12	5
M_6_F_qp_Set4	1.12743	0	0.111111	2570.52	56.2757	7.7675e-15	4
M_6_F_qp_Set5	1.1675	0	0.0833333	2573.66	59.4155	1.63727e-15	4
M_6_F_lqp_Set1	1.13264	0	0.0555556	2566.1	51.8624	7.24384e-14	5
M_6_F_lqp_Set2	1.13463	0	0.0555556	2566.48	52.2407	6.07592e-14	5
M_6_F_lqp_Set3	1.13815	0	0.0555556	2558.93	44.6856	2.69179e-12	6
M_6_F_lqp_Set4	1.12656	0	0.111111	2571.12	56.8774	6.14574e-15	5
M_6_F_lqp_Set5	1.18137	0	0.0277778	2574.51	60.2723	1.14129e-15	5
M_8_F_l_Set1	1.1324	0	0.0555556	2568.05	53.8112	2.92767e-14	4
M_8_F_l_Set2	1.12795	0	0.0555556	2567.48	53.243	3.94557e-14	4
M_8_F_l_Set3	1.14004	0	0.0555556	2568.32	54.082	2.63152e-14	4
M_8_F_l_Set4	1.1549	0	0.0555556	2568.44	54.1961	2.52237e-14	3
M_8_F_l_Set5	1.18017	0	0.0277778	2568.54	54.2947	2.43713e-14	2
M_8_F_q_Set1	1.14675	0	0.0555556	2562.46	48.2204	5.15788e-13	3
M_8_F_q_Set2	1.12839	0	0.0555556	2565.55	51.3115	1.11667e-13	4
M_8_F_q_Set3	1.15692	0	0.0555556	2562.49	48.2488	5.24523e-13	3
M_8_F_q_Set4	1.15931	0	0.0555556	2567.86	53.6218	3.63015e-14	3
M_8_F_q_Set5	1.1763	0	0	2573.31	59.071	2.41902e-15	2
M_8_F_p_Set1	1.13636	0	0.0555556	2570.55	56.3079	9.78927e-15	4
M_8_F_p_Set2	1.1182	0	0.0555556	2567.45	53.2064	4.69312e-14	4
M_8_F_p_Set3	1.17345	0	0.0277778	2569.24	54.9998	1.94707e-14	4
M_8_F_p_Set4	1.13708	0	0.0555556	2573.65	59.4115	2.18219e-15	4
M_8_F_p_Set5	1.14708	0	0.0277778	2589.08	74.8406	9.91094e-19	3
M_8_F_lp_Set1	1.12269	0	0.0833333	2567.31	53.0731	5.37777e-14	4
M_8_F_lp_Set2	1.13219	0	0.0833333	2565.33	51.0898	1.47629e-13	3
M_8_F_lp_Set3	1.1429	0	0.0555556	2566.75	52.5125	7.3837e-14	4
M_8_F_lp_Set4	1.13022	0	0.0833333	2570.03	55.7863	1.46404e-14	4
M_8_F_lp_Set5	1.17947	0	0.0277778	2573.02	58.7757	3.34778e-15	4
M_8_F_lq_Set1	1.13839	0	0.0555556	2563.95	49.7115	3.17348e-13	4
M_8_F_lq_Set2	1.12435	0	0.0833333	2564.21	49.9721	2.84201e-13	4
M_8_F_lq_Set3	1.14153	0	0.0555556	2564.59	50.3443	2.40802e-13	4
M_8_F_lq_Set4	1.15533	0	0.0555556	2568.95	54.7088	2.77297e-14	4
M_8_F_lq_Set5	1.17658	0	0.0277778	2568.55	54.3067	3.4634e-14	2
M_8_F_qp_Set1	1.13465	0	0.0833333	2565.32	51.0767	1.77954e-13	4
M_8_F_qp_Set2	1.13374	0	0.0555556	2566.39	52.1514	1.06314e-13	4
M_8_F_qp_Set3	1.15273	0	0.0555556	2564.27	50.033	3.13651e-13	5
M_8_F_qp_Set4	1.13079	0	0.0833333	2571.19	56.9451	1.01295e-14	4
M_8_F_qp_Set5	1.16599	0	0.0555556	2572.21	57.9704	6.2128e-15	3
M_8_F_lqp_Set1	1.13039	0	0.0833333	2567.24	53.0023	7.63247e-14	5
M_8_F_lqp_Set2	1.13455	0	0.0833333	2565.83	51.5912	1.58465e-13	4
M_8_F_lqp_Set3	1.14096	0	0.0555556	2565.16	50.9175	2.27689e-13	5
M_8_F_lqp_Set4	1.12488	0	0.0833333	2569.78	55.5347	2.32355e-14	4
M_8_F_lqp_Set5	1.17996	0	0.0277778	2573.02	58.7764	4.71993e-15	4
M_10_F_l_Set1	1.13694	0	0.0555556	2568.64	54.3938	4.34162e-14	3
M_10_F_l_Set2	1.13043	0	0.0833333	2569.84	55.6018	2.44188e-14	4
M_10_F_l_Set3	1.13509	0	0.0555556	2567.52	53.2831	8.01654e-14	3
M_10_F_l_Set4	1.15574	0	0.0555556	2569.11	54.8662	3.74418e-14	3
M_10_F_l_Set5	1.17589	0	0.0277778	2568.89	54.6515	4.30055e-14	2
M_10_F_q_Set1	1.13014	0	0.0555556	2563.27	49.0302	7.3818e-13	3
M_10_F_q_Set2	1.12346	0	0.0555556	2566.95	52.7065	1.21426e-13	4
M_10_F_q_Set3	1.13292	0	0.0555556	2563.3	49.0581	7.78961e-13	3
M_10_F_q_Set4	1.15068	0	0.0555556	2568.35	54.1118	6.45049e-14	3
M_10_F_q_Set5	1.18062	0	0	2573.66	59.4192	4.71147e-15	2
M_10_F_p_Set1	1.12673	0	0.0555556	2572.15	57.9102	1.04115e-14	4
M_10_F_p_Set2	1.10427	0	0.0555556	2569.23	54.9838	4.68057e-14	4
M_10_F_p_Set3	1.17004	0	0.0277778	2570.71	56.4667	2.32461e-14	4
M_10_F_p_Set4	1.12413	0	0.0555556	2575.45	61.2113	2.26419e-15	4
M_10_F_p_Set5	1.11381	0	0.0277778	2592.91	78.6726	3.82774e-19	3
M_10_F_lp_Set1	1.12922	0	0.0833333	2569.61	55.366	4.61884e-14	4
M_10_F_lp_Set2	1.13285	0	0.0833333	2565.76	51.5143	3.33115e-13	3
M_10_F_lp_Set3	1.14556	0	0.0555556	2568.3	54.0554	9.85372e-14	4
M_10_F_lp_Set4	1.12803	0	0.0833333	2571.11	56.8692	2.55065e-14	4
M_10_F_lp_Set5	1.15232	0	0.0277778	2573.51	59.2677	8.15247e-15	4
M_10_F_lq_Set1	1.13678	0	0.0555556	2565.42	51.1742	4.96393e-13	4
M_10_F_lq_Set2	1.12989	0	0.0833333	2565.4	51.1557	5.35435e-13	4
M_10_F_lq_Set3	1.14226	0	0.0555556	2566.01	51.773	4.22267e-13	4
M_10_F_lq_Set4	1.16171	0	0.0277778	2569.68	55.4354	7.30437e-14	4
M_10_F_lq_Set5	1.18256	0	0.0277778	2568.91	54.6696	1.16396e-13	2
M_10_F_qp_Set1	1.13484	0	0.0833333	2568.58	54.3411	1.50166e-13	5
M_10_F_qp_Set2	1.13409	0	0.0555556	2567.78	53.5337	2.48392e-13	4
M_10_F_qp_Set3	1.16028	0	0.0555556	2566.85	52.6081	4.40702e-13	4
M_10_F_qp_Set4	1.13559	0	0.0833333	2572	57.7625	3.79213e-14	4
M_10_F_qp_Set5	1.15339	0	0.0277778	2572.71	58.4658	3.07494e-14	3
M_10_F_lqp_Set1	1.12647	0	0.0833333	2566.18	51.939	9.48441e-13	4
M_10_F_lqp_Set2	1.12509	0	0.0833333	2567.2	52.9536	6.96519e-13	4
M_10_F_lqp_Set3	1.14276	0	0.0555556	2566.22	51.9798	1.45231e-12	4
M_10_F_lqp_Set4	1.12992	0	0.0833333	2572.78	58.5432	7.59202e-14	5
M_10_F_lqp_Set5	1.15226	0	0.0277778	2573.51	59.2652	8.69771e-14	4
