# Supplementary material for: Potential Distribution of <em>Aedes (Ochlerotatus) scapularis</em> (Diptera: Culicidae): A Vector Mosquito New to the Florida Peninsula
Source: Preprints.org preprint supplement (doi:10.20944/preprints202012.0502.v1), 2020-12-21
Supplement: Supplementary file 2 [file Table_S2_best_candidate_models.xlsx]

## Sheet: Table_S2_best_candidate_models
Best candidate models. Numbers indicating the regularization multiplier (0.3 and 0.7) are included in the model name; 'qp' indicates quadratic + product features; Set3 indicates that the 3rd set of uncorrelated environmental variables were used in the model.
Model	Mean AUC ratio	pvalue of pROC	Omission rate at 5%	AICc	delta_AICc	W_AICc	number of parameters
M_0.3_F_qp_Set3	1.2903	0	0.0277778	2518.8	0	0.868656	10
M_0.7_F_qp_Set3	1.24243	0	0.0277778	2519.45	0.644713	0.293417	7
